# Supplementary material
Source: publisher figshare collection journal article supplement (https://frontiersin.figshare.com/ndownloader/files/22104648)
Supplement: Supplementary file 1 [file 22104648]

## Sheet: Sheet1
Table S2. Fossil sample
Fossil	Age	Locality	Body mass	Accession	Museum
			estimates (g)	number
Paralouatta marianae	approximately 18.5–17.5 Ma	Domo de Zaza, Lagunitas Formation, Cuba	4709*	MNHNCu 76.3059	Museo Nacional de Historia Natural de Cuba, La Habana, Cuba
Paralouatta varonai	Late Quaternary	Sierra de Galeras, Pinar del Río, Cuba	8444**	MNHNCu 76.1037	Museo Nacional de Historia Natural de Cuba, La Habana, Cuba
*(Püschel et al., 2018)
** (Silvestro et al., 2019)
